# Supplementary material for: A novel photocycloaddition of substituted pyridines with benzofuran
Source: Royal Society of Chemistry journal article supplement (doi:10.1039/b002396p), 2000-01-01
Supplement: b002396p.doc [file b002396p.doc]

***Supporting Information***

***Experimental Section***

***General Methods***

NMR spectra were recorded on CDCl3 solutions on a JEOL GSX-400 and Brucker-300, respectively, for 1H- and 13C-NMR spectroscopy unless otherwise noted. Chemical shifts are reported in parts per million (ppm) relative to TMS as internal standards. Elemental analyses were made using a Perkin-Elmer-240 instrument. Ultraviolet (UV) spectra were determined with a JASCO model V-570 UV/VIS/NIR spectrophotometer. IR spectra were recorded on a JASCO FT/IR-230 spectrometer as KBr disks, unless otherwise noted. An Eikohsya 500-w high-pressure mercury lamp was used as irradiation source.

***Preparation of alkylated 2-Alkoxy-3-cyano-pyridines* 1a-c.**

These pyridines were prepared from corresponding 2-chloro-3-cyanopyridines according to the method in the literature by substitution reaction with the corresponding sodium alkoxides.9

***General Procedure for the Photochemical Reaction of 2-Alkoxy-3-cyanopyridine 1 in the presence of Benzofuran.***

A benzene solution of 2-alkoxy-3-cyanopyridines (0.02 M) containing 0.05 M of benzofuran was deaerated by bubbling argon for 15 min. and was irradiated by Pyrex filtered light with a 1kw high-pressure mercury lamp at 15-20 °C. After irradiation, the solvent was removed *in vacuo* and the residual mixture was subjected to chromatography on silica gel (eluant: n-hexane : ethyl acetate = 9 : 1). The crystalline photoproducts were recrystallized from a mixture of chloroform and hexane.

***Quenching experiments of pyridine-benzofuran systems***

The irradiation was performed by using a uranyl glass filtered light with a 500-w high-pressure mercury lamp. A C6D6 solution of **1a** (0.02 M) containing furan (0.2 M) and triplet quencher (0.01M-0.1 M) was irradiated The quencher do not absorb light in the excitation region of **1a**. The reactions were monitored by 1H NMR spectroscopy.

***Frontier-MO calculations using the PM3 Hamiltonian:***

Frontier MO calculation was achieved by PM3 method contained in MOPAC program (version 6.601) available for Power Macintosh.26 The keywords, GEO-OK, SINGLET, EXCITED, PM3, VECTOR, C.I.=4 and DENSITY, were added for calculation of singlet excited state of 3-cyano-2-methoxy-6-methylpyridine **1a**. The keywords, PM3, DENSITY and GEO-OK were used for calculation of benzofuran.

***(endo)-7-Cyano-2-methoxy-4-methyl-9-oxa-3-aza-10,11-benzotricyclo[6.3.0.04,7]undeca-2,5-diene 2a***

m.p. 95-96 °C; IR (KBr) 2225, 1681, 1593 cm-1; 1H-NMR (CDCl3)  1.68 (s, 3H, CH3), 3.81 (s, 3H, OCH3), 4.26 (d, J=9.2 Hz, 1H, 1-CH), 5.40 (d, J=9.2 Hz, 1H, 8-CH), 5.79 (d, J=2.8 Hz, 1H, 5-CH), 6.23 (d, J=2.8 Hz, 1H, 6-CH), 6.84-7.19 (m, 4H, ArH); 13C-NMR (CDCl3)  24.9 (q, CH3), 39.3 (d, 1-C), 46.3 (s, 7-C), 53.0 (q, OCH3), 67.9 (s, 4-C), 82.6 (d, 8-C), 109.3 (d, 15-C), 120.6 (s, CN), 121.6 (d, 13-C), 123.8 (d, 12-C), 124.21 (s, 11-C), 129.2 (d, 14-C), 130.8 (d, 6-C), 148.6 (d, 5-C), 157.0 (s, 2-C), 158.6 (s, 10-C); Anal. Calcd for C16H14N2O2: C, 72.12; H, 5.30; N, 10.52 %; Found: C, 72.13; H, 5.40; N, 10.50 %.

***X-Ray Crystallographic Analysis of 2a***

Colorless prismatic crystal of C16H14N2O2, orthorhombic space group Fdd2, a=17.024(6) Å, b=29.192(7) Å, c=11.183(4) Å, V=5557(3) Å3, Z=16, =1.273 g/cm3, (CuK)=6.93 cm-1. The structure was solved by the direct method and refined by the method of full-matrix least-squares, where the final R and Rw were 0.057 and 0.065 for 1410 reflections.

***(exo)-7-Cyano-2-methoxy-4-methyl-9-oxa-3-aza-10,11-benzotricyclo[6.3.0.04,7]undeca-2,5-diene 3a***

m.p. 153-154 °C; IR (KBr) 2234, 1667 cm-1; 1H-NMR (CDCl3)  1.74 (s, 3H, CH3), 3.60 (s, 3H, OCH3), 3.63 (d, J=8.0 Hz, 1H, 1-CH), 5.06 (d, J=8.0 Hz, 1H, 8-CH), 6.18 (d, J=2.9 Hz, 1H, 5-CH), 6.50 (d, J=2.9 Hz, 1H, 6-CH), 6.91, 6.94 (m, 1H, ArH), 7.20 (m, 1H, ArH), 7.43 (m, 1H, ArH); 13C-NMR (CDCl3)  25.1 (q, CH3), 38.3 (d, 1-C), 45.8 (s, 7-C), 52.8 (q, OCH3), 67.3 (s, 4-C), 80.5 (d, 8-C), 110.5 (d, 15-C), 118.5 (s, CN), 121.4 (d, 13-C), 125.7 (s, 11-C), 127.3 (d, 12-C), 129.4 (d, 14-C), 130.3 (d, 6-C), 150.5 (d, 5-C), 156.9 (s, 2-C), 158.0 (s, 10-C); Anal. Calcd for C16H14N2O2: C,7 2.17; H, 5.30; N, 10.52 %; Found: C, 71.87; H, 5.29; N, 10.48 %.

***X-Ray Crystallographic Analysis of 3a***

Colorless prismatic crystal of C16H14N2O2, triclinic space group P-1, a=9.903(2) Å, b=10.132(2) Å, c=7.430(1) Å, a=91.75(1)°, b=105.73(2)°, =108.74(1)°, V=673.8(2) Å3, Z=2, =1.312 g/cm3, (CuK)=7.14 cm-1. The structure was solved by the direct method and refined by the method of full-matrix least-squares, where the final *R* and *Rw* were 0.055 and 0.066 for 2777 reflections.

***(endo)-7-Cyano-2-ethoxy-4-methyl-9-oxa-3-aza-10,11-benzotricyclo[6.3.0.04,7]undeca-2,5-diene 2b*** was obtained as a mixture with the starting pyridine **1b**, and could not be isolated. IR (KBr) 2225, 1680 cm-1; 1H-NMR (CDCl3)  1.36 (q, 3H, CH2*CH3*), 1.67 (s, 3H, CH3), 3.81 (m, 2H, OCH2), 4.47 (d, J=9.2 Hz, 1H, 1-CH), 5.38 (d, J=9.2 Hz, 1H, 8-CH), 6.23 (d, J=2.7 Hz, 1H, 5-CH), 6.22 (d, J=2.7 Hz, 1H, 6-CH), 6.84-7.19 (m, 4H, ArH).; 13C-NMR (CDCl3)  14.3 (q, CH2*CH3*), 25.0 (q, CH3), 39.4 (d, 1-C), 46.3 (s, 7-C), 61.5 (OCH2), 67.9 (s, 4-C), 82.6 (d, 8-C), 109.4 (d, 15-C), 120.8 (s, CN), 121.7 (d, 13-C), 123.8 (d, 12-C), 124.4 (s, 11-C), 129.2 (d, 14-C), 130.8 (d, 6-C), 148.6 (d, 5-C), 156.5 (s, 2-C), 158.7 (s, 10-C).

***(exo)-7-Cyano-2-ethoxy-4-methyl-9-oxa-3-aza-10,11-benzotricyclo[6.3.0.04,7]undeca-2,5-diene 3b***

m.p. 134-135°; IR (KBr) 2234, 1667 cm-1; 1H-NMR (CDCl3)  1.74 (s, 3H, CH3), 3.60 (s, 3H, OCH3), 3.63 (d, J=8.0 Hz, 1H, 1-CH), 5.06 (d, J=8.0 Hz, 1H, 8-CH), 6.18 (d, J=2.9 Hz, 1H, 5-CH), 6.50 (d, J=2.9 Hz, 1H, 6-CH), 6.91 (m, 1H, ArH), 6.94 (m, 1H, ArH), 7.20 (m, 1H, ArH), 7.43 (m, 1H, ArH).; 13C-NMR (CDCl3)  25.1 (q, CH3), 38.3 (d, 1-C), 45.8 (s, 7-C), 52.8 (q, OCH3), 67.3 (s, 4-C), 80.5 (d, 8-C), 110.5 (d, 5-C), 118.5 (s, CN), 121.4 (d, 6-C), 125.7 (s, 11-C), 127.3 (d, 12-C), 129.4 (d, 13-C), 130.3 (d, 14-C), 150.5 (d, 15-C), 156.9 (s, 2-C), 158.0 (s, 10-C); Anal. Calcd for C17H16N2O2: C, 72.84; H, 5.75; N, 9.99 %; Found: C, 72.58; H, 5.77; N, 9.96 %.

***(endo)-7-Cyano-2-methoxy-4,6-dimethyl-9-oxa-3-aza-10,11-benzotricyclo[6.3.0.04,7]undeca-2,5-diene 2c***

m.p. 151-152 °C; IR (KBr) 2223, 1686 cm-1;1H-NMR (CDCl3)  1.61 (s, 3H, CH3), 1.65 (s, 3H, CH3), 3.79 (s, 3H, OCH3), 4.23 (d, J=9.4 Hz, 1H, 1-CH), 5.43 (d, J=9.4 Hz, 1H, 8-CH), 6.00 (s, 1H, 5-CH), 6.81-6.83 (m, 1H, ArH), 6.87-6.91 (m, 1H, ArH), 7.13-7.17 (m, 1H, ArH), 7.24-7.26 (m, 1H, ArH).; 13C-NMR (CDCl3)  14.8 (q, CH3), 25.0 (q, CH3), 39.2(d, 1-C), 47.2 (s, 7-C), 52.9 (q, OCH3), 64.8 (s, 4-C), 83.5 (d, 8-C), 110.1 (d, 5-C), 120.6 (s, CN), 120.6 (s, 6-C), 121.5 (d, 12-C), 124.5 (d, 11-C), 124.9 (s, 15-C), 128.9 (d, 14-C), 143.3 (d, 13-C), 156.9 (s, 2-C), 158.2 (s, 10-C); Anal. Calcd for C17H16N2O2: C, 72.84; H, 5.75; N, 9.99 %; Found: C, 72.64; H, 5.66; N, 9.90 %.

***(exo)-7-Cyano-2-methoxy-4,6-dimethyl-9-oxa-3-aza-10,11-benzotricyclo[6.3.0.04,7]undeca-2,5-diene 3c***

m.p. 149-150 °C; IR (KBr) 2234, 1678 cm-1**;** 1H-NMR (CDCl3)  1.68 (s, 3H, CH3), 1.84 (s, 3H, CH3), 3.58 (s, 3H, OCH3), 3.63 (d, J=7.9 Hz, 1H, 1-CH), 5.04 (d, J=7.9 Hz, 1H, 8-CH), 6.15 (s, 1H, 5-CH), 7.20, 7.43 (m, 4H, ArH); 13C-NMR (CDCl3)  19.6 (q, CH3), 24.9 (q, CH3), 38.3 (d, 1-C), 47.7 (s, 7-C), 52.6 (q, OCH3), 64.3 (s, 4-C), 79.5 (d, 8-C), 110.4 (d, 5-C), 121.3 (s, CN), 121.6 (d, 6-C), 127.2 (d, 12-C), 129.3 (s, 11-C), 130.5 (d, 13-C), 131.6 (d, 14-C), 142.8 (d, 15-C), 155.9 (s, 2-C), 158.0 (s, 10-C); Anal. Calcd for C17H16N2O2: C, 72.84; H, 5.75; N, 9.99 %; Found: C, 72.63; H, 5.68; N, 10.02 %.
